# Supplementary material for: Genome-wide identification and expression profile of GhGRF gene family in Gossypium hirsutum L
Source: PeerJ. 2022 May 13;10:e13372. doi: 10.7717/peerj.13372 (PMC9109687; doi:10.7717/peerj.13372)
Supplement: Supplemental Information 5 [file peerj-10-13372-s005.xlsx]

## Sheet: Sheet1
root			stem			leaf			flower			Pistil			Stamen			-2 O			0 O			1 O			3 O			5 O			10 O			10 F			15 O			15 F			20 O			20 F
Pos	Cp		Pos	Cp		Pos	Cp		Pos	Cp		Pos	Cp		Pos	Cp		Pos	Cp		Pos	Cp		Pos	Cp		Pos	Cp		Pos	Cp		Pos	Cp		Pos	Cp		Pos	Cp		Pos	Cp		Pos	Cp		Pos	Cp
A1	22.55		A1	21.28		A1	23.03		A1	24.2		A1	24.27		A1	25.95		A1	21.19		A1	21.83		A1	20.89		A1	21.24		A1	20.73		A1	31.03		A1	22.49		A1	26.96		A1	23.02		A1	22.29		A1	24.52
A2	22.3		A2	21.55		A2	23.08		A2	24.17		A2	24.49		A2	26.11		A2	21.23		A2	22.08		A2	20.87		A2	21.27		A2	20.79		A2	31.21		A2	22.58		A2	27.04		A2	23.07		A2	22.44		A2	24.47
A3	22.52		A3	21.33		A3	23.13		A3	24.31		A3	24.43		A3	26.12		A3	21.23		A3	21.66		A3	20.9		A3	21.25		A3	20.75		A3	31.13		A3	22.63		A3	27.03		A3	22.97		A3	22.44		A3	24.53
A4	29.83		A4	24.95		A4	23.82		A4	28.68		A4	31.5		A4	30.63		A4	28		A4	23.57		A4	23.27		A4	24.76		A4	27.06		A4	26.29		A4	28.04		A4	30.63		A4	30.16		A4	25.89		A4	28.45
A5	29.9		A5	25.19		A5	23.93		A5	28.61		A5	31.71		A5	30.88		A5	28.17		A5	23.63		A5	23.25		A5	24.72		A5	27.1		A5	26.81		A5	29.24		A5	30.28		A5	29.85		A5	25.82		A5	29.11
A6	30.59		A6	25.42		A6	23.84		A6	28.8		A6	31.94		A6	30.68		A6	28.06		A6	23.6		A6	23.28		A6	24.72		A6	27.22		A6	26.55		A6	27.89		A6	30.65		A6	29.77		A6	25.89		A6	28.62
A7	29.63		A7	25.28		A7	24.05		A7	29.49		A7	31.44		A7	32.45		A7	27.73		A7	23.78		A7	23.63		A7	26.26		A7	27.56		A7	35.47		A7	28.46		A7	31.52		A7	32.2		A7	26.27		A7	34.34
A8	29.53		A8			A8	24.43		A8	29.81		A8	31.84		A8	32.85		A8	27.85		A8	24.08		A8	23.65		A8	25.33		A8	27.77		A8	40		A8	28.68		A8	31.48		A8	32.71		A8	26.26		A8	35
A9	29.55		A9	25.33		A9	24.17		A9			A9	31.66		A9	33.02		A9	27.77		A9	24.13		A9	23.61		A9	25.13		A9	27.6		A9	37.97		A9	29.68		A9	31.65		A9	32.63		A9	26.19		A9	34.47
A10	30.13		A10	28.57		A10	30.55		A10	33.53		A10	31.73		A10	34.71		A10	26.06		A10	25.81		A10	25.67		A10	25.85		A10	26.69		A10	35.68		A10	30.85		A10	31.62		A10	33.6		A10	25.48		A10	32.21
A11	31.14		A11	28.75		A11	30.48		A11	33.81		A11	32.85		A11	35.65		A11	26.02		A11	25.95		A11	25.41		A11	25.84		A11	26.67		A11	35.96		A11	30.94		A11	31.84		A11	32.13		A11	25.45		A11	32.44
A12			A12	28.63		A12	31.02		A12	33.9		A12	32.17		A12	33.89		A12	26.13		A12	25.8		A12	25.46		A12	25.76		A12	26.65		A12	36.56		A12	30.9		A12	31.28		A12	32.75		A12	25.48		A12	32.32
B1	28.14		B1	26.49		B1	28.46		B1	32.94		B1	30.17		B1	32.79		B1	24.17		B1	23.66		B1	23.41		B1	23.96		B1	25.13		B1	37.71		B1	30.14		B1	30.78		B1	31.53		B1	24.16		B1	30.49
B2	28.19		B2	26.58		B2	28.76		B2	33.62		B2	30.1		B2	32.47		B2	24.21		B2	23.78		B2	23.46		B2	23.95		B2	25.1		B2	35.67		B2	30.43		B2	30.74		B2	31		B2	24.2		B2	30.59
B3	28.29		B3	26.71		B3	28.29		B3			B3	29.86		B3	32.9		B3	24.28		B3	23.65		B3	23.32		B3	24.03		B3	25.13		B3	40		B3	30.46		B3	30.76		B3	31.44		B3	24.16		B3	30.52
B4	29.23		B4	28.84		B4	30.72		B4	33.63		B4	34.33		B4	32.53		B4	26.14		B4	24.93		B4	25.44		B4	25.48		B4	25.73		B4	40		B4	29.6		B4	30.44		B4	32.68		B4	25.69		B4	35
B5	29.26		B5	28.7		B5	30.57		B5			B5	32.86		B5	32.08		B5	26.22		B5	24.86		B5	25.5		B5	25.58		B5	25.98		B5	35.65		B5	29.49		B5	30.79		B5	31.79		B5	25.62		B5	35
B6	29.58		B6	28.99		B6	30.76		B6	35.99		B6	33.87		B6	31.78		B6	26.32		B6	24.97		B6	25.51		B6	25.53		B6	25.81		B6	35.79		B6	29.81		B6	30.59		B6	31.75		B6	25.68		B6	35
B7	29.51		B7	28.77		B7	30.26		B7	33.33		B7	31.68		B7	30.8		B7	25.9		B7	24.97		B7	25.14		B7	25.29		B7	25.71		B7	34.77		B7	29.28		B7	30.68		B7	31.11		B7	25.7		B7	31.57
B8	29.33		B8	28.82		B8	30.12		B8	31.95		B8	32.16		B8	31.52		B8	26.01		B8	24.92		B8	25.47		B8	25.49		B8	25.84		B8	34.61		B8	29.24		B8	30.84		B8	31.52		B8	25.65		B8	31.79
B9			B9	28.78		B9	30.71		B9	32.08		B9	31.79		B9	31.79		B9	26.04		B9	24.99		B9			B9	25.46		B9	25.72		B9	36.91		B9	29.03		B9	30.61		B9	31.75		B9	25.74		B9	31.86
B10	31.43		B10			B10	27.78		B10	31.09		B10	31.19		B10	34.1		B10	25.02		B10	24.58		B10	24.8		B10	24.61		B10	25.42		B10	40		B10	31.56		B10	33.32		B10	34.27		B10	26.62		B10	31.43
B11	31.28		B11	36		B11	27.74		B11	31.47		B11	31.25		B11	33.29		B11	25.16		B11	24.66		B11	24.86		B11	24.67		B11	25.49		B11	37.2		B11	31.13		B11	32.95		B11	33.31		B11	26.65		B11	31.9
B12	31.7		B12			B12	27.75		B12	31.61		B12	31.49		B12	33.47		B12	25		B12	24.65		B12	24.9		B12	24.71		B12	25.46		B12	40		B12	31.77		B12	32.86		B12	32.92		B12	26.65		B12	32.28
C1	31.72		C1	28.06		C1	28.95		C1	31.5		C1	30.95		C1	33.07		C1	25.63		C1	25.72		C1	25.92		C1	25.91		C1	26.42		C1	38.35		C1	31.07		C1	33.78		C1	33.57		C1	27.6		C1	32.3
C2	31.71		C2	28.21		C2	28.48		C2	31.81		C2	31.51		C2	32.96		C2	25.8		C2	25.79		C2	25.96		C2	25.82		C2	26.55		C2	34.6		C2	31.8		C2	33.51		C2	34.53		C2	27.7		C2	32.42
C3	32.09		C3	28.17		C3	28.58		C3	32.3		C3	31.42		C3	32.57		C3	25.8		C3	26.09		C3	25.93		C3	25.9		C3	26.43		C3	35.84		C3	31.22		C3	34.77		C3	35.52		C3	27.8		C3	35
C4	30.84		C4	28.66		C4	30.12		C4	32.53		C4	31.51		C4	32.22		C4	25.2		C4	24.95		C4	24.66		C4	25.04		C4	25.74		C4	39.08		C4	29.5		C4	32.87		C4	32.7		C4	25.92		C4	33.4
C5	31.13		C5	28.85		C5	30.15		C5	32.54		C5	31.67		C5	32.53		C5	25.31		C5	25.04		C5	24.81		C5	25.16		C5	25.8		C5	40		C5	29.54		C5	32.67		C5	32.9		C5	25.94		C5	33.64
C6	31.1		C6	28.68		C6	31.59		C6	31.72		C6	31.7		C6	32.64		C6	25.33		C6	25.06		C6	24.77		C6	25.04		C6	25.67		C6	36.24		C6	30.78		C6	32.31		C6	32.98		C6	25.93		C6	35
C7	30.69		C7	27.66		C7	27.77		C7	31.87		C7	30.93		C7	31.53		C7	24.15		C7	23.01		C7	23.48		C7	23.88		C7	24.6		C7	35.87		C7	30.12		C7	31.47		C7	31.13		C7	24.71		C7	32.15
C8	31.06		C8	27.45		C8			C8	31.8		C8	30.7		C8	32.93		C8	24.15		C8	22.98		C8	23.62		C8	23.87		C8	24.63		C8	35.92		C8	30.5		C8	31.86		C8	31.82		C8	24.79		C8	32.22
C9	30.88		C9	27.69		C9	27.33		C9			C9	30.86		C9	31.86		C9	24.18		C9	23.09		C9	23.45		C9	23.87		C9	24.63		C9	34.63		C9	30.96		C9	31.42		C9	31.97		C9	24.74		C9	31.8
C10	29.11		C10	26.19		C10	28.23		C10	27.63		C10	27.19		C10	28.8		C10	24.78		C10	23.54		C10	24.02		C10	23.8		C10	24.88		C10	33.85		C10	28.17		C10	32.29		C10	28.32		C10	25.32		C10	27.69
C11	28.86		C11	26.15		C11	28.21		C11	27.61		C11	27.24		C11	28.79		C11	23.88		C11	23.67		C11	24.13		C11	23.82		C11	24.88		C11	32.51		C11	27.74		C11	32.09		C11	28.49		C11	25.31		C11	27.58
C12	28.86		C12	26.2		C12	28.28		C12			C12	27.12		C12	28.93		C12	23.91		C12	23.57		C12	24.02		C12	23.8		C12	24.9		C12	33.12		C12	28.03		C12	31.98		C12	28.52		C12	25.53		C12	27.71
D1	28.55		D1	26.79		D1	28.81		D1	27.71		D1	27.83		D1	29.86		D1	23.88		D1	24.48		D1	24.54		D1	24.95		D1	25.59		D1	35.13		D1	28.16		D1	32.05		D1	29.02		D1	26.21		D1	28.58
D2	28.75		D2	26.73		D2	28.97		D2	27.59		D2	27.69		D2	29.71		D2	24.01		D2	24.57		D2	24.55		D2	25.03		D2	25.67		D2	36.46		D2	28.31		D2	31.98		D2	28.88		D2	26.19		D2	28.51
D3	28.62		D3	26.81		D3	28.98		D3	27.48		D3	27.84		D3	29.97		D3	23.9		D3	24.53		D3	24.67		D3	25.02		D3	25.67		D3	35.52		D3	28.33		D3	32.24		D3	28.91		D3	26.17		D3	28.24
D4	33.21		D4	32.16		D4	34.61		D4	35.91		D4	36.12		D4	34.17		D4	29.21		D4	29.29		D4	29.1		D4	30.27		D4	29.87		D4	40		D4	30.77		D4	33.68		D4	34.23		D4	29.45		D4	34.44
D5	33.01		D5	32.16		D5	34.92		D5	37.64		D5	35.61		D5	34.95		D5	29.08		D5	29.21		D5	29.57		D5	30.78		D5	29.63		D5	40		D5	32.25		D5	33.66		D5	35.16		D5	29.21		D5	33.83
D6	32.83		D6	31.82		D6	36.67		D6	37.14		D6	35.87		D6	34.45		D6	29.29		D6	29.14		D6	29.42		D6	31.12		D6	29.53		D6	40		D6	30.57		D6	34.14		D6	35.46		D6	29.18		D6	34.11
D7	34.44		D7	32.43		D7	36.14		D7	40		D7	36.6		D7	36.1		D7	28.5		D7	28.71		D7	29.24		D7	30.3		D7	30.24		D7	35.93		D7	33.14		D7	33.75		D7	36.85		D7	29.23		D7	35
D8	33.77		D8	32.01		D8	37.69		D8	40		D8	40		D8			D8	28.76		D8	28.86		D8	29.44		D8	30.12		D8	30.46		D8	40		D8	35.73		D8	34.56		D8	36.13		D8	28.78		D8	35
D9	32.81		D9	31.64		D9	35.16		D9	40		D9	35.32		D9	37.5		D9	28.73		D9	28.85		D9	28.94		D9	30.42		D9	30.58		D9	36.2		D9	34.76		D9	34.23		D9	37.37		D9	29.01		D9	35
D10	32.07		D10	31.09		D10			D10	29.44		D10	30.51		D10	29.64		D10	29.2		D10	29.13		D10	29.82		D10	29.25		D10	29.97		D10	32.54		D10	28.69		D10	32.77		D10	31.01		D10	29.79		D10	33.62
D11	30.7		D11	31.25		D11	30.29		D11	28.5		D11	29.78		D11	29.89		D11	29.18		D11	29.18		D11	30.47		D11	29.43		D11	30.46		D11	34.52		D11	28.99		D11	32.77		D11	31		D11	29.8		D11	32.79
D12	30.34		D12	30.55		D12	30.31		D12	28.23		D12	29.91		D12	30.07		D12	29.17		D12	29.88		D12	29.62		D12	29.88		D12	30.58		D12	33.2		D12	28.46		D12	32.06		D12	30.49		D12	29.62		D12
E1	34.11		E1	30.43		E1	31.31		E1	30.87		E1	33.81		E1	36.59		E1	25.97		E1	25.53		E1	25.92		E1	27.16		E1	27.03		E1	37.09		E1	30.73		E1	40		E1	33.09		E1	28.47		E1	33.95
E2	34.79		E2	29.97		E2	30.74		E2	31.42		E2	34.08		E2	34.34		E2	26		E2	25.58		E2	26.03		E2	27.29		E2	26.85		E2	40		E2	30.41		E2			E2	33.11		E2	28.46		E2	33.53
E3	34.05		E3	30.29		E3	31.77		E3	32.08		E3	33.66		E3	35.05		E3	25.98		E3	25.52		E3	25.93		E3	27.22		E3	26.9		E3	40		E3	30.13		E3			E3	33.28		E3	28.2		E3	34.43
E4	35.71		E4	32.31		E4	34.51		E4	32.63		E4	33.64		E4	35.73		E4	28.07		E4	27.3		E4	27.97		E4	29.16		E4	29.11		E4	40		E4	31.75		E4	40		E4	34.7		E4	30.62		E4	35
E5	37		E5	32.67		E5	33.92		E5	32.92		E5	34.82		E5	36.07		E5	28		E5	27.49		E5	28.19		E5	29.43		E5	29.06		E5	40		E5	31.19		E5	40		E5	34.77		E5	30.28		E5	35
E6	36.07		E6	31.7		E6	29.25		E6	33.08		E6	34.49		E6	36.17		E6	27.63		E6	27.6		E6	28.23		E6	29.22		E6	28.85		E6	37.28		E6	30.81		E6	40		E6	35.42		E6	30.7		E6	35
E7	32.16		E7	30.68		E7	35.72		E7	34.05		E7	31.31		E7	31.23		E7	25.61		E7	25.83		E7	24.93		E7	24.24		E7	25.99		E7	40		E7	28.14		E7	33.84		E7	28.6		E7	28.19		E7	29.74
E8	32.33		E8	30.84		E8	33.54		E8	34.53		E8	31.23		E8	31.54		E8	25.66		E8	25.84		E8	25.03		E8	24.42		E8	26		E8	40		E8	27.95		E8	33.03		E8	28.66		E8	28.1		E8	29.58
E9	32.12		E9	31.21		E9	34.15		E9	33.04		E9	31.5		E9	31.71		E9	25.7		E9	25.79		E9	25.19		E9	24.31		E9	26.19		E9	40		E9	27.92		E9	33.48		E9	28.75		E9	28.09		E9	29.67
E10	27.65		E10	27.92		E10	27.52		E10	27.72		E10	26.6		E10	25.99		E10	23.55		E10	23.81		E10	22.94		E10	23.68		E10	23.7		E10	36.52		E10	25.92		E10	32.2		E10	28.2		E10	25.69		E10	28.79
E11	27.55		E11	27.6		E11	28.01		E11			E11	27.08		E11	26.58		E11	23.18		E11	24.23		E11	23.06		E11	23.32		E11	23.61		E11	35.29		E11	26.32		E11	32.81		E11	28.46		E11	25.81		E11	28.57
E12	27.7		E12	27.58		E12	27.86		E12	27.72		E12	26.1		E12			E12	23.19		E12	23.74		E12	22.92		E12	23		E12	23.7		E12	35.71		E12	25.77		E12	31.43		E12	28.52		E12	25.23		E12	28.33
F1	30.83		F1	28.32		F1	28.87		F1	30.19		F1	29.55		F1	29.89		F1	22.51		F1	22.1		F1	21.99		F1	22.7		F1	22.75		F1	37		F1	27.46		F1	32.11		F1	29.42		F1	24.65		F1	29.75
F2	30.86		F2	28.43		F2	29.77		F2	29.85		F2	29.62		F2	30.54		F2	22.51		F2	22.13		F2	22.08		F2	22.75		F2	22.8		F2	35.93		F2	28.16		F2	31.91		F2	29.85		F2	24.67		F2	30.22
F3	30.95		F3	28.29		F3			F3	29.94		F3	29.86		F3	29.93		F3	22.58		F3	22.14		F3	22.14		F3	22.79		F3	22.76		F3	36.9		F3	27.47		F3	31.48		F3	29.24		F3	24.61		F3	29.82
F4	30.95		F4	27.79		F4	29.99		F4	30.48		F4	30.28		F4	30.56		F4	21.88		F4	21.29		F4	21.48		F4	21.95		F4	22.08		F4	33.79		F4	27.21		F4	30.73		F4	28.95		F4	23.7		F4	29.91
F5	30.71		F5	27.89		F5	29.76		F5	30.87		F5	30.75		F5	30.12		F5	21.94		F5	21.31		F5	21.49		F5	21.98		F5	22.08		F5	34.57		F5	27.22		F5	31.15		F5	29		F5	23.7		F5	29.81
F6	30.24		F6	27.99		F6	30.68		F6	30.73		F6	30.27		F6	30.58		F6	21.94		F6	21.32		F6	21.48		F6	21.94		F6	22.07		F6	35.02		F6	26.99		F6	31.11		F6	28.85		F6	23.71		F6	29.5
F7	28.99		F7	27.72		F7	27.1		F7	31.08		F7	30.43		F7	29.97		F7	23.19		F7	22.56		F7	21.73		F7	21.57		F7	24.23		F7	31.9		F7	27.77		F7	31.81		F7	28.92		F7	24.81		F7	28.96
F8	28.98		F8	27.87		F8	27.42		F8	30.97		F8	30.58		F8	29.98		F8	23.11		F8	22.61		F8	21.94		F8	21.61		F8	24.25		F8	31.53		F8	27.78		F8	31.62		F8	28.9		F8	24.87		F8	28.9
F9	28.88		F9	27.88		F9	27.49		F9	31.47		F9	30.3		F9	30.23		F9	23.13		F9	22.7		F9	21.85		F9	21.56		F9	24.43		F9	32.3		F9	28.05		F9	31.48		F9	28.81		F9	24.84		F9	28.89
F10	25.97		F10	27.19		F10	26.66		F10	27.56		F10	28.53		F10	26.99		F10	22.92		F10	23		F10	21.9		F10	21.6		F10	24.23		F10	35.71		F10	27.41		F10	31.42		F10	28.62		F10	24.81		F10	28.86
F11	25.83		F11	27.27		F11	26.78		F11	27.49		F11			F11	27.61		F11	22.91		F11	23.07		F11	21.89		F11	21.63		F11	24.22		F11	38.16		F11	27.52		F11	31.59		F11	28.81		F11	24.79		F11	28.94
F12	25.75		F12	27.23		F12			F12	27.22		F12	27.96		F12	27.05		F12	22.88		F12	22.98		F12	21.9		F12	21.62		F12	24.18		F12	40		F12	27.02		F12	31.61		F12	28.79		F12			F12	28.89
G1	30.21		G1	27.19		G1	29.88		G1	28.11		G1	28.94		G1	30.27		G1	23.89		G1	25.11		G1	24.57		G1	24.88		G1	25.99		G1	37.12		G1	29.25		G1	33.26		G1	30.51		G1	26.81		G1	29.11
G2	30.44		G2	27.28		G2	29.97		G2	28.28		G2	28.59		G2	29.86		G2	23.9		G2	25.16		G2	24.71		G2	25.15		G2	25.99		G2	35.99		G2	29.18		G2	32.6		G2	30.32		G2	26.8		G2	29.34
G3	30.14		G3	27.22		G3	29.89		G3	28.49		G3	28.71		G3	30.14		G3	23.79		G3	25.14		G3	24.56		G3	24.97		G3	25.86		G3	40		G3	29.09		G3	34.2		G3	30.09		G3	26.87		G3	29.32
G4	30.3		G4	27.59		G4	29.2		G4			G4	28.79		G4	31.17		G4	24.3		G4	24.86		G4	24.86		G4	25.2		G4	25.83		G4	38.72		G4	28.43		G4	33.79		G4	30.43		G4	26.71		G4	28.95
G5	30.78		G5	27.62		G5	28.94		G5	29.65		G5	28.66		G5	30.88		G5	24.32		G5	24.97		G5	24.91		G5	25.2		G5	25.75		G5	35.12		G5	27.92		G5	34.41		G5	30.46		G5	26.69		G5	29.14
G6	30.88		G6	27.68		G6	29.31		G6	29.84		G6	28.73		G6	30.83		G6	24.3		G6	24.88		G6	24.92		G6	25.17		G6	25.84		G6	36.74		G6	27.98		G6	33.17		G6	30.57		G6	26.86		G6	28.9
G7	31.71		G7	32.2		G7	34.63		G7			G7	38.44		G7	31.85		G7	23.29		G7	22.45		G7	22.79		G7	22.64		G7	22.96		G7			G7	32.92		G7	40		G7	33.08		G7	40		G7	35
G8	31.99		G8	31.94		G8	33.94		G8	36.79		G8	36.49		G8	31.82		G8	23.32		G8	22.48		G8	23.24		G8	22.61		G8	23.01		G8			G8	32.89		G8	36.88		G8	34.45		G8	36.77		G8	35
G9	31.63		G9	31.94		G9	34.71		G9	36.84		G9	40		G9	31.85		G9	23.31		G9	22.5		G9	22.8		G9	22.62		G9	22.94		G9	40		G9	32.68		G9	40		G9	33.16		G9	40		G9	35
G10	30.98		G10	28.53		G10	29.16		G10	35.15		G10	33.15		G10	32.26		G10	23.6		G10	23.69		G10	22.74		G10	22.69		G10	23.57		G10	35.11		G10	30.7		G10	35.62		G10	32.18		G10	31.15		G10	32.27
G11	30.53		G11	28.42		G11	29.46		G11	35.22		G11	34.68		G11	32.06		G11	23.61		G11	23.65		G11	22.75		G11	22.78		G11	23.52		G11	40		G11	31.04		G11	35.11		G11	32.09		G11	31.13		G11	32
G12	30.52		G12	28.45		G12	29.53		G12	35.21		G12	33.03		G12	32.42		G12	23.58		G12			G12	22.73		G12	22.69		G12	23.55		G12	36.63		G12	31.01		G12	34.56		G12	32.23		G12	31.42		G12	31.72
H1	30.81		H1	30		H1	28.99		H1	27.05		H1	28.35		H1	28.72		H1	23.68		H1	23.51		H1	23.55		H1	23.16		H1	23.31		H1	31.9		H1	25.66		H1	31.7		H1	27.11		H1	24.09		H1	28.54
H2	31.05		H2	30.09		H2	29.57		H2	27		H2	28.54		H2	28.63		H2	23.65		H2	23.63		H2	23.65		H2	23.12		H2	23.3		H2	31.9		H2	25.72		H2	31.91		H2	27.12		H2	24.18		H2	28.5
H3	30.89		H3	30		H3	29.55		H3	26.93		H3	28.75		H3	28.85		H3	23.66		H3	23.54		H3	23.59		H3	23.17		H3	23.33		H3	32.05		H3	25.67		H3	31.44		H3	27.09		H3	24.11		H3	28.66
H4	32.94		H4	32.45		H4	32.32		H4	29.84		H4	31.46		H4	31.6		H4	26.11		H4	25.99		H4	25.55		H4	25.18		H4	25.16		H4	33.76		H4	27.85		H4	34.51		H4	29.68		H4	26.3		H4	31.51
H5	32.94		H5	32.44		H5	32.08		H5	29.91		H5	31.29		H5			H5	26.47		H5	25.9		H5	25.73		H5	25.47		H5	25.3		H5	32.97		H5	27.98		H5	33.12		H5	29.76		H5	26.69		H5	31.37
H6	33.23		H6	32.08		H6	32.13		H6	29.83		H6	31.44		H6	31.58		H6	25.9		H6	25.84		H6			H6	25.46		H6	25.29		H6	33.61		H6	27.92		H6	34.07		H6	29.75		H6	26.43		H6	31.66
H7	28.27		H7	25.73		H7	25.18		H7	26.92		H7	28.66		H7	27.7		H7	24.99		H7	24.74		H7	22.96		H7	23.02		H7	23.15		H7	34.6		H7	27.65		H7	30.7		H7	29.67		H7	24.12		H7	28.71
H8	28.18		H8	25.73		H8	25.21		H8	26.78		H8	28.69		H8	27.74		H8	24.94		H8	24.71		H8	22.93		H8	23.02		H8	23.17		H8	38.07		H8	27.56		H8	30.62		H8	29.9		H8	24.15		H8	28.82
H9	28.21		H9	25.72		H9	25.08		H9	26.75		H9	28.76		H9	27.62		H9	24.95		H9	24.72		H9	22.98		H9	23		H9	23.17		H9	35.03		H9	28.12		H9	30.81		H9	29.9		H9	24.1		H9	28.73
H10	28.43		H10	24.97		H10	25.27		H10	26.96		H10	28.82		H10	27.75		H10	24.95		H10	24.44		H10	23.04		H10	23.03		H10	22.98		H10	38.2		H10	28.68		H10	31.11		H10	30.05		H10	23.92		H10	28.95
H11	26.52		H11	24.96		H11	25.42		H11	26.95		H11	28.84		H11			H11	24.95		H11	24.44		H11	23.04		H11	23.05		H11	22.97		H11	35.08		H11	28.67		H11	31.15		H11	30.12		H11	23.94		H11	28.94
H12	26.9		H12	24.96		H12	25.34		H12	26.94		H12	28.97		H12	27.73		H12	24.94		H12	24.49		H12	23.09		H12	22.97		H12	22.98		H12	34.62		H12	28.32		H12	31.62		H12	30.05		H12	23.5		H12	28.86
A1	29.9		B4	29.44		C7	23.8		D10	24.21		F1	24.29		G4	26.61		A1	19.68		B4	19.44		C7	21.09		D10	21.56		F1	20.92		G4	31.73		A1	22.63		B4	27.12		C7	23.09		D10	22.46		F1	24.62
A2	30.63		B5	29.67		C8	23.79		D11	24.46		F2	24.89		G5	27.09		A2	19.76		B5	19.56		C8	21.03		D11	22.02		F2	20.97		G5	32.08		A2	22.57		B5	27.26		C8	23.19		D11	22.45		F2	24.65
A3	30.23		B6	29.59		C9	23.99		D12	24.42		F3	24.66		G6	27.03		A3	20		B6	19.6		C9	21.04		D12	21.61		F3	20.93		G6	31.58		A3	22.58		B6	27.63		C9	23.11		D12	22.44		F3	24.58
A4	32.52		B7	28.88		C10	26.99		E1	28.93		F4	29.67		G7	30.6		A4	25.58		B7	25.45		C10	25.11		E1	25.19		F4	25.97		G7	40		A4	31.08		B7	34.28		C10	31.86		E1	27.75		F4	32.71
A5	32.43		B8	28.75		C11	26.93		E2	29.11		F5	29.6		G8	30.71		A5	25.62		B8	25.33		C11	25.02		E2	25.34		F5	25.95		G8	35.83		A5	31.07		B8	32.83		C11	31.73		E2	27.72		F5	32.23
A6	32.56		B9	28.69		C12	27.17		E3	28.83		F6	29.64		G9	30.68		A6	25.53		B9	25.46		C12	25.02		E3	25.32		F6	25.93		G9	40		A6	30.91		B9	34.29		C12	32.09		E3	27.65		F6	32.11
A7	26.91		B10	27.42		D1	28.14		E4	28.15		F7	28.65		G10	28.66		A7	25.11		B10	24.86		D1	24.82		E4	25.45		F7	26.01		G10	27.03		A7	27.17		B10	26.08		D1	27.04		E4	27.07		F7	26.68
A8	27.23		B11	27.55		D2	28.11		E5	28.86		F8	27.93		G11	27.75		A8	25.18		B11	25.01		D2	24.75		E5	25.44		F8	26.09		G11	27.93		A8	26.55		B11	26.97		D2	26.99		E5	27.18		F8	27.27
A9	27.54		B12	27.72		D3	28		E6	28.38		F9	28.53		G12	28.58		A9	25.11		B12	25		D3	24.81		E6	25.45		F9	25.83		G12	27.48		A9	26.92		B12			D3	26.99		E6	27.22		F9	27.11
A10			C1	36.04		D4	28.01		E7	27.66		F10	27.09		H1	30.79		A10	24.14		C1	23.78		D4	23.95		E7	25.24		F10	25.72		H1	36.25		A10	30.02		C1	30.74		D4	30.73		E7	25.31		F10	30.2
A11	35.51		C2	35.14		D5	27.89		E8	27.44		F11	26.9		H2	30.79		A11	24.14		C2	23.79		D5	23.97		E8	25.12		F11	25.73		H2	37.61		A11	30.09		C2	31.29		D5	30.49		E8	25.43		F11	30.83
A12			C3	34.78		D6	27.79		E9	27.19		F12	27.25		H3	31.21		A12	24.12		C3	23.88		D6	24.19		E9	25.13		F12	25.7		H3	40		A12	30		C3	31.24		D6	30.61		E9	25.48		F12	30.3
B1	34.43		C4	34.5		D7	31.26		E10	27.98		G1	28.83		H4	32.94		B1	23.85		C4	23.23		D7	25.31		E10	25.95		G1	26.7		H4	39.36		B1	31.26		C4	32.55		D7	32.42		E10	25.89		G1	31.62
B2	34.95		C5	34.85		D8	31.31		E11	28.52		G2	28.98		H5	32.57		B2	23.96		C5	23.08		D8	25.32		E11	25.93		G2	26.62		H5	37.42		B2	31.06		C5	32.46		D8	32.42		E11	25.82		G2	31.83
B3	34.15		C6	33.95		D9	30.88		E12	28.22		G3	29.08		H6	32.33		B3	23.72		C6	23.19		D9	25.27		E12	25.95		G3	26.67		H6	40		B3	32		C6	31.93		D9	31.85		E12	25.87		G3	31.51
