# Supplementary material for: Genome-wide identification and expression profile of GhGRF gene family in Gossypium hirsutum L
Source: PeerJ. 2022 May 13;10:e13372. doi: 10.7717/peerj.13372 (PMC9109687; doi:10.7717/peerj.13372)
Supplement: Supplemental Information 6 [file peerj-10-13372-s006.xlsx]

## Sheet: Sheet1
CK			IAA-0.5h			IAA-1h			IAA-3h			IAA-5h			BL-0.5h			BL-1h			BL-3h			BL-5h			GA-0.5h			GA-1h			GA-3h			GA-5h
Pos	Cp		Pos	Cp		Pos	Cp		Pos	Cp		Pos	Cp		Pos	Cp		Pos	Cp		Pos	Cp		Pos	Cp		Pos	Cp		Pos	Cp		Pos	Cp		Pos	Cp
A1	21.55		A1	20		A1	19.41		A1	20.69		A1	20.78		A1	19.7		A1	19.96		A1	20.27		A1	20.49		A1	20.03		A1	20.5		A1	20.5		A1	21.11
A2	21.72		A2	20.07		A2	19.55		A2	21.15		A2	20.97		A2	19.74		A2	20.16		A2	20.28		A2	20.43		A2	20.08		A2	20.53		A2	20.51		A2	21.2
A3	21.63		A3	20.05		A3	19.58		A3	20.78		A3	20.82		A3	19.7		A3	20.18		A3	20.31		A3	20.46		A3	20.18		A3	20.54		A3	20.51		A3	21.16
A4	28.47		A4	27.88		A4	28.01		A4	28.36		A4	28.48		A4	27.48		A4	27.84		A4	27.67		A4	27.92		A4	28.32		A4	28.97		A4	28.77		A4	29.9
A5			A5	27.91		A5	27.98		A5	28.59		A5	28.45		A5	27.44		A5	27.96		A5	27.64		A5	27.96		A5	28		A5	29.07		A5	28.74		A5	29.61
A6	28.68		A6	27.88		A6	28.31		A6	28.58		A6	28.31		A6	27.51		A6	27.85		A6	27.54		A6	27.95		A6	28.2		A6	29.25		A6	28.77		A6	29.77
A7	28.7		A7	28.02		A7	28.14		A7			A7	28.33		A7	27.52		A7	28.09		A7	27.72		A7	28.01		A7	28.29		A7	29.53		A7	28.88		A7	29.75
A8	28.97		A8	27.9		A8	28.33		A8	29.14		A8	28.45		A8	27.52		A8	28.19		A8	27.85		A8	27.95		A8	28.22		A8	29.29		A8	28.85		A8	29.77
A9	28.49		A9	28.05		A9	28.44		A9	29.04		A9	28.43		A9	27.52		A9	28.13		A9	27.95		A9	28.09		A9	28.22		A9	29.47		A9	28.89		A9	29.61
A10	28.32		A10	26.71		A10	26.08		A10	27.43		A10	27.13		A10	26.48		A10	26.95		A10	27.22		A10	27		A10	26.88		A10	27.57		A10	27.33		A10	28.29
A11	28.46		A11	26.7		A11	26.08		A11	27.53		A11	27.03		A11	26.57		A11	27.16		A11	27.18		A11	27.19		A11	26.97		A11	27.71		A11	27.52		A11	28.14
A12	28.08		A12	26.67		A12	26.14		A12	27.48		A12	27.1		A12	26.48		A12	26.86		A12	27.11		A12	26.89		A12	26.88		A12	27.55		A12	27.6		A12	28.13
B1	27.12		B1	25.94		B1	25.66		B1	26.98		B1	26.68		B1	25.95		B1	26.33		B1	26.54		B1	26.45		B1	26.04		B1	26.89		B1	26.91		B1	27.58
B2	27.14		B2	26.1		B2	25.75		B2			B2	26.7		B2	26.09		B2	26.48		B2	26.96		B2	26.55		B2	25.99		B2	26.96		B2	26.92		B2	27.56
B3	27.42		B3	26.07		B3	25.68		B3	27.08		B3	26.65		B3	25.89		B3	26.23		B3	26.6		B3	26.49		B3	26.09		B3	26.95		B3	27.02		B3	27.68
B4	26.64		B4	23.58		B4	23.25		B4	24.85		B4	24.63		B4	23.51		B4	24.5		B4	24.6		B4	24.19		B4	23.67		B4	24.94		B4	24.59		B4	25.11
B5	26.7		B5	23.58		B5	23.21		B5	24.84		B5	24.69		B5	23.49		B5	24.51		B5	24.53		B5	24.26		B5	23.83		B5	24.94		B5	24.55		B5	25.13
B6	26.68		B6	23.64		B6	23.2		B6	24.91		B6	24.66		B6	23.52		B6	24.48		B6	24.57		B6	24.29		B6	23.74		B6	24.99		B6	24.55		B6	25.16
B7	26.72		B7	23.57		B7	23.23		B7	24.78		B7	24.62		B7	23.53		B7	24.46		B7	24.47		B7	24.2		B7	23.75		B7	24.96		B7	24.56		B7	25.12
B8	26.53		B8	23.6		B8	23.25		B8	24.82		B8	24.63		B8	23.48		B8	24.47		B8	24.81		B8	24.21		B8	23.77		B8	24.91		B8	24.54		B8	25.12
B9	26.5		B9	23.59		B9	23.25		B9	24.88		B9	24.77		B9	23.5		B9	24.33		B9	24.55		B9	24.22		B9	23.71		B9	24.93		B9	24.51		B9	25.07
B10	29.26		B10	26.9		B10	27.26		B10	29.53		B10	30.68		B10	26.88		B10	27.92		B10	28.18		B10	28.08		B10	27.47		B10	28.65		B10	29.45		B10	30.24
B11	28.87		B11			B11	27.34		B11	29.56		B11	30.95		B11	26.82		B11	27.89		B11	28.2		B11	27.98		B11	27.45		B11	28.75		B11	29.32		B11	30.28
B12	28.93		B12	26.99		B12	27.3		B12	29.32		B12	31.02		B12	27.05		B12	27.87		B12	27.99		B12	28.08		B12	27.54		B12	28.81		B12	29.42		B12	30.33
C1	29.21		C1	27.69		C1	27.86		C1	29.46		C1	31.12		C1	27.46		C1	28.28		C1	28.26		C1	28.34		C1	27.98		C1	29.26		C1	29.63		C1	30.63
C2	29.68		C2	27.66		C2	27.95		C2	29.6		C2	31.08		C2	27.44		C2	28.28		C2	28.47		C2	28.24		C2	27.92		C2	29.41		C2	29.58		C2	30.62
C3	29.18		C3	27.56		C3			C3	29.62		C3	30.79		C3	27.54		C3	28.52		C3	28.33		C3	28.53		C3	27.94		C3	29.17		C3	29.51		C3	30.66
C4	27.02		C4	24.88		C4	25.19		C4	26.32		C4	25.89		C4	25.01		C4	25.65		C4	25.09		C4	24.59		C4	25.58		C4	27.02		C4	26.01		C4	26.54
C5			C5	24.98		C5	25.09		C5	27.03		C5	25.92		C5	25.01		C5	25.62		C5	25.14		C5	24.64		C5	25.6		C5	27.08		C5	26.06		C5	26.63
C6	26.91		C6	24.93		C6			C6	26.49		C6	25.91		C6	24.99		C6	25.67		C6	25.12		C6	24.63		C6	25.53		C6	27.05		C6	25.9		C6	26.54
C7	26.72		C7	24.78		C7	24.96		C7	26.23		C7	25.81		C7	24.83		C7	25.49		C7	24.86		C7	24.43		C7	25.5		C7	26.73		C7	25.87		C7	26.46
C8	26.74		C8	24.76		C8	24.93		C8	29.32		C8	25.77		C8	24.83		C8	25.49		C8	24.9		C8	24.43		C8	25.28		C8	26.81		C8	25.83		C8	26.29
C9	26.73		C9	24.81		C9	24.92		C9	26.34		C9	25.73		C9	24.82		C9	25.42		C9	24.89		C9	24.42		C9	25.28		C9	26.77		C9	25.81		C9	26.34
C10	26.7		C10	25.22		C10	25.58		C10	26.5		C10	26.43		C10	25.17		C10	25.31		C10	25.45		C10	25.15		C10	25.77		C10	26.91		C10	26.46		C10	26.45
C11	26.84		C11	25.18		C11	25.61		C11	26.65		C11	26.49		C11	25.12		C11	25.35		C11	25.43		C11	25.19		C11	25.83		C11	26.97		C11	26.46		C11	26.42
C12	26.74		C12	25.24		C12	25.65		C12	26.54		C12	26.24		C12	25.13		C12	25.45		C12	25.28		C12	25.13		C12	25.75		C12	26.88		C12	26.32		C12	26.32
D1	26.95		D1	25.71		D1	25.92		D1	26.94		D1	26.71		D1	25.54		D1	25.68		D1	25.67		D1	25.52		D1	26.04		D1	27.32		D1	26.68		D1	26.67
D2	26.9		D2	25.69		D2	25.94		D2	26.95		D2	26.64		D2	25.56		D2	25.73		D2	25.72		D2	25.46		D2	26.17		D2	27.33		D2	26.7		D2	26.77
D3	26.97		D3	25.66		D3	25.86		D3	26.88		D3	26.74		D3	25.54		D3	25.69		D3	25.73		D3	25.53		D3	26.15		D3	27.24		D3	26.7		D3	26.86
D4	29.66		D4	27.12		D4	26.6		D4			D4	29.95		D4	26.91		D4	28.53		D4	28.27		D4	28.42		D4	27.17		D4	29.06		D4	28.85		D4	29.58
D5	30		D5	27		D5	26.55		D5	29.12		D5	29.59		D5	26.91		D5	28.16		D5	28.14		D5	28.71		D5	27.42		D5	29.04		D5	29.08		D5	30.04
D6	29.7		D6			D6	26.66		D6	28.97		D6	29.98		D6	26.79		D6	28.52		D6	28.46		D6	28.62		D6	27.28		D6	28.86		D6	29.02		D6	29.86
D7	29.41		D7	26.56		D7	25.94		D7	28.8		D7	28.56		D7	26.25		D7	28.05		D7	27.6		D7	27.79		D7	27.07		D7	28.8		D7	28.73		D7	29.12
D8	29.55		D8	26.68		D8	26.11		D8	28.68		D8	28.62		D8	26.27		D8	28.64		D8	27.6		D8	27.89		D8	26.89		D8	28.66		D8	28.62		D8	29.03
D9	29.19		D9	26.49		D9	26.06		D9	28.61		D9	28.56		D9	26.18		D9	27.93		D9	27.51		D9	27.78		D9	26.79		D9	28.71		D9	28.66		D9	29.15
D10	28.71		D10	29		D10	29.58		D10	29.96		D10	29.62		D10	29.33		D10	29.46		D10	28.05		D10	29.69		D10	29.61		D10	30.04		D10	30.17		D10	30.09
D11	30.27		D11	28.97		D11	29.61		D11	28.71		D11	30.15		D11	30.65		D11	28.97		D11	28.35		D11	29.45		D11	29.23		D11	29.61		D11	30		D11	30.06
D12	29.57		D12	28.61		D12	26.43		D12	30.77		D12			D12	28.09		D12	28.91		D12	27.24		D12	30.18		D12	28.44		D12	29.18		D12	29.7		D12	31.48
E1	33.14		E1	31.03		E1	30.71		E1	30.73		E1	30.42		E1	30.94		E1	31.64		E1	30.8		E1	30.56		E1	31.63		E1	32.94		E1	31.94		E1	31.95
E2	34.3		E2	32.25		E2	30.67		E2	30.68		E2	30.81		E2	30.93		E2	32.12		E2	30.56		E2	30.69		E2	31.71		E2	32.91		E2	32.07		E2	32.1
E3	34.03		E3	31.38		E3	30.46		E3	30.86		E3	30.87		E3	31.47		E3	32.11		E3	30.7		E3	30.54		E3	31.39		E3	34.03		E3	32.41		E3	32.3
E4	32.85		E4	31.48		E4	32.19		E4	32.24		E4	32.66		E4	32.38		E4	34.43		E4	32.44		E4	31.91		E4	32.46		E4	35		E4	33.24		E4	33.82
E5	32.58		E5	31.49		E5	32.01		E5	32.86		E5	32.9		E5	33.18		E5	33.36		E5	32.26		E5	31.86		E5	32.69		E5	35		E5	34.43		E5	34.35
E6	33.57		E6	31.72		E6	32.31		E6	32.35		E6	32.65		E6	33.34		E6	33.93		E6	32.45		E6	31.79		E6	32.77		E6	35		E6	34.2		E6	35
E7	33.43		E7	30.33		E7	28.98		E7	28.79		E7	26.54		E7	30.34		E7	30.08		E7	30.7		E7	30.52		E7	30.33		E7	30.15		E7	30.26		E7	30.02
E8	33.07		E8			E8	29.12		E8	29.55		E8	26.66		E8	30.13		E8	30.17		E8	30.98		E8			E8	30.48		E8	30.61		E8	29.8		E8	29.82
E9	32.88		E9	30.55		E9	28.86		E9	29.75		E9	26.51		E9	30.46		E9	30.67		E9	31.45		E9	30.5		E9	30.41		E9	30.53		E9	30.07		E9	30.11
E10	26.71		E10	25.67		E10	24.55		E10	28.52		E10	24.57		E10	24.91		E10	25.18		E10	25.64		E10	25.49		E10	25.12		E10	26.76		E10	25.74		E10	26.15
E11	26.71		E11	25.63		E11	24.63		E11	28.73		E11	25.2		E11	25.31		E11	25.43		E11	25.74		E11	25.67		E11	25.19		E11	26.46		E11	25.47		E11	26.01
E12	26.45		E12	25.65		E12	24.74		E12	28.67		E12	24.23		E12	25.83		E12	24.97		E12	24.98		E12	25.51		E12	25.02		E12	26.02		E12	25.44		E12	26.26
F1	28.53		F1	26.62		F1	26.15		F1	27.26		F1	27.1		F1	26.82		F1	27.26		F1	25.81		F1	26.1		F1	27		F1	28.54		F1	26.91		F1	27.61
F2	28.7		F2	26.68		F2	26.65		F2	27.35		F2	27.34		F2	26.79		F2	27.61		F2	26		F2	26.21		F2	26.97		F2	28.74		F2	27.01		F2	27.82
F3	28.62		F3	26.65		F3	26.54		F3	27.29		F3	27.86		F3	26.93		F3	27.47		F3	26.06		F3	26.22		F3	27.05		F3	28.82		F3	27.06		F3	27.94
F4	27.87		F4	25.83		F4	25.68		F4			F4	26.66		F4	25.97		F4	26.67		F4	25.28		F4	25.56		F4	26.3		F4	28.32		F4	26.53		F4	27.3
F5	27.83		F5	25.82		F5	25.78		F5	26.44		F5	26.75		F5	25.9		F5	26.66		F5	25.19		F5	25.6		F5	26.46		F5	28.46		F5	26.53		F5	27.33
F6	27.83		F6	25.75		F6	25.62		F6	26.82		F6	26.75		F6	26.11		F6	26.82		F6	25.23		F6	25.58		F6	26.45		F6	28.27		F6	26.56		F6	27.49
F7	27.83		F7	26.98		F7	26.19		F7	24.31		F7	23.45		F7	26.68		F7	26.03		F7	25.22		F7	25.59		F7	27.32		F7	27.44		F7	24.91		F7	24.92
F8			F8	27.15		F8	26.3		F8	24.33		F8	23.3		F8	26.72		F8	26.99		F8	25.18		F8	25.58		F8	27.26		F8	27.27		F8	24.88		F8	25.16
F9	27.71		F9	27.29		F9	26.31		F9	24.14		F9	23.32		F9	26.7		F9	26.02		F9	25.42		F9	25.56		F9	27.45		F9	27.43		F9	24.88		F9	24.9
F10	27.27		F10	27.21		F10	26.2		F10	24.07		F10	23.32		F10	26.59		F10	25.95		F10	25.22		F10	25.51		F10	27.01		F10	27.46		F10	24.77		F10	25.05
F11	27.59		F11	26.88		F11	26.2		F11	24.22		F11	23.47		F11	26.72		F11	25.8		F11	24.97		F11	25.59		F11	27.02		F11	27.26		F11	24.88		F11	24.95
F12	27.74		F12	26.55		F12	26.19		F12	24.12		F12	31.65		F12	26.5		F12	25.58		F12	24.62		F12	25.76		F12	26.88		F12	27.09		F12	24.89		F12	25.04
G1	29.88		G1	28.08		G1	27.83		G1	29.49		G1	30.19		G1	28.29		G1	28.67		G1	28.6		G1	28.88		G1	28.33		G1	29.64		G1	29.34		G1	30
G2	29.61		G2	28.13		G2	27.93		G2	30.05		G2	30		G2	27.83		G2	28.64		G2	28.72		G2	28.85		G2	28.44		G2	29.61		G2	29.21		G2	30.05
G3	29.7		G3			G3	28.03		G3	29.98		G3	29.91		G3	27.96		G3	28.75		G3	28.98		G3	28.99		G3	28.27		G3	29.55		G3	29.03		G3	29.88
G4	29.55		G4	28.57		G4	27.97		G4	29.54		G4	29.76		G4	28.06		G4	28.8		G4	28.79		G4	28.87		G4	28.5		G4	29.46		G4	28.91		G4	29.6
G5	29.54		G5	28.29		G5	27.94		G5	29.56		G5	29.61		G5	28.09		G5	28.51		G5	28.98		G5	28.73		G5	28.7		G5	29.18		G5	28.87		G5	29.61
G6	29.71		G6	28.34		G6	28.13		G6	29.55		G6	29.46		G6	28.27		G6	28.62		G6	28.9		G6	28.8		G6	28.6		G6	29.48		G6	28.88		G6	29.19
G7	29.88		G7	26.9		G7	26.62		G7	27.74		G7	27.09		G7	26.77		G7	26.75		G7	27.45		G7	27.72		G7	27.02		G7	27.28		G7	27.44		G7	27.95
G8	29.86		G8	26.83		G8	26.68		G8	27.66		G8	27.06		G8	26.86		G8	26.71		G8	27.45		G8	27.76		G8	27.01		G8	27.52		G8	27.48		G8	28.02
G9	29.91		G9	26.87		G9	26.67		G9	28.1		G9	27.02		G9	26.98		G9	27.75		G9	27.46		G9	27.84		G9	27.08		G9	27.48		G9	27.42		G9	27.95
G10	31.24		G10	30.57		G10	30.03		G10	29.73		G10	28.03		G10	29.99		G10	30.04		G10	29.82		G10	29.87		G10	30.49		G10	30.43		G10	29.78		G10	29.03
G11	31.24		G11	30.07		G11	30.25		G11	29.64		G11	27.94		G11	29.91		G11	30.21		G11	30.02		G11	29.77		G11	30.65		G11	30.75		G11	29.63		G11	29.19
G12	31.44		G12	30.16		G12	30.28		G12	29.76		G12	28.3		G12	33.1		G12	30.1		G12	29.89		G12	29.59		G12	30.64		G12	30.76		G12	29.75		G12	29.05
H1	29.35		H1	27.33		H1	27.66		H1	30.21		H1	29.86		H1	27.47		H1	28.64		H1	28.85		H1	29.16		H1	27.56		H1	29.47		H1	29.75		H1	29.84
H2	29.29		H2	27.48		H2	27.65		H2	30.34		H2	30.78		H2	27.26		H2	28.78		H2	29.02		H2	29.32		H2	27.61		H2	29.74		H2	29.64		H2	30.51
H3	29.42		H3	27.53		H3	27.63		H3	30.46		H3	30.68		H3	27.46		H3	28.87		H3	29.22		H3	29.32		H3	27.64		H3	29.63		H3	29.59		H3	30.16
H4	32.6		H4	30.18		H4			H4	33.21		H4	34.02		H4	29.6		H4	31.4		H4	31.98		H4	32.09		H4	30.41		H4	32.11		H4	32.35		H4	32.93
H5			H5	30.14		H5	30.08		H5	31.82		H5	33.34		H5	30.3		H5	31.12		H5	31.67		H5	31.75		H5	30.31		H5	32.3		H5	32.14		H5	32.87
H6			H6	30.48		H6	29.82		H6	32.81		H6	34.08		H6	29.84		H6			H6	31.58		H6	32.12		H6	30.12		H6	32.25		H6	31.9		H6	33.06
H7	27.71		H7	24.71		H7	24.47		H7	26.44		H7	26.18		H7	24.67		H7	26.12		H7	26.18		H7	26.75		H7	24.93		H7	26.46		H7	27.2		H7	28.11
H8	27.8		H8	24.73		H8	24.47		H8	26.72		H8	26.2		H8	24.75		H8	26.17		H8	26.27		H8	26.75		H8	25.06		H8	26.51		H8	27.17		H8	28.15
H9			H9	24.71		H9	24.46		H9	25.98		H9	26.27		H9	24.65		H9	26.08		H9			H9	26.82		H9	24.95		H9	26.5		H9	27.3		H9	28.16
H10	27.75		H10	24.52		H10	24.16		H10	26.47		H10	25.97		H10	24.33		H10	25.94		H10	26.23		H10	26.62		H10	24.77		H10	26.29		H10	27.02		H10	27.97
H11	27.7		H11	24.54		H11	24.2		H11	26.52		H11	26		H11	24.42		H11	25.99		H11	26.19		H11	26.69		H11	24.74		H11	26.46		H11	27.17		H11	27.87
H12	27.76		H12			H12	24.06		H12	25.95		H12	25.97		H12	24.33		H12			H12	18.59		H12	26.62		H12	24.72		H12	26.26		H12	27.05		H12	28.11
E1	27.32		F1	25.13		G1	25.31					C4	26.65											A4	27.3		B7	25.67								F4	27.94
E2	27.53		F2	25.33		G2	25.03		H1	26.21		C5	26.69		D7	25.63					G1	27.71		A5	27.32		B8	25.65		C10	27.09		E1	27.56		F5	27.83
E3	27.63		F3	25.31		G3	25.08		H2	26.46		C6	26.66		D8	25.59		E10	27.64		G2	28.05		A6	27.22		B9	25.67		C11	27.11		E2	27.54		F6	27.92
E4	26.37		F4	25.77		G4	25.68		H3	26.47		C7	27.19		D9	25.59		E11	27.59		G3	27.96		A7	26.91		B10	25.91		C12	27.1		E3	27.57		F7	27.78
E5	27.05		F5	25.83		G5	25.71		H4	26.95		C8	26.98		D10			E12	27.06		G4	27.26		A8	27.16		B11	25.83		D1	26.82		E4	27.69		F8	27.65
E6	26.99		F6	25.55		G6	25.33		H5	26.81		C9	27.08		D11			F1	26.83		G5	27.47		A9	27.1		B12	26.03		D2	26.98		E5	27.53		F9	27.9
E7	29.87		F7	29.04		G7	29.71		H6	26.8		C10	29.43		D12			F2	26.93		G6	27.26		A10	31.41		C1	28.08		D3	27.14		E6	27.85		F10	33
E8	29.68		F8	28.69		G8	29.48		H7	33		C11	35		E1	27.88		F3	27.27		G7	32.75		A11	32.47		C2	28.1		D4	30.41		E7	33		F11	33
E9	29.88		F9	28.69		G9	29.4		H8	33		C12	29.7		E2	27.78		F4	30.48		G8	32.93		A12	31.83		C3	28.28		D5	30.39		E8	33		F12	33
									H9	33		D1	32.03		E3	28.03		F5	30.43		G9	33.09		B1	30.89		C4	27.98		D6	30.12		E9	33		G1	33
A4	29.67		A10	28.18		B4	28.43					D2	33.5		E4	27.33		F6	30.67		G10	32.05		B2	31.03		C5	27.87		D7	31.05		E10	33		G2	33
A5	29.27		A11	27.96		B5	28.56		B10	33.15		D3	33.02		E5	27.54		F7	30.14		G11	32.39		B3	31.18		C6	27.77		D8	31.09		E11	32.08		G3	33
A6	29.88		A12	28.21		B6	28.8		B11	32.29					E6	27.48		F8	31.75		G12	35								D9	30.42		E12	32.58
									B12	32.15								F9	30.42
