# Supplementary material for: Genome-wide identification and expression profile of GhGRF gene family in Gossypium hirsutum L
Source: PeerJ. 2022 May 13;10:e13372. doi: 10.7717/peerj.13372 (PMC9109687; doi:10.7717/peerj.13372)
Supplement: Supplemental Information 7 [file peerj-10-13372-s007.xlsx]

## Sheet: Sheet1
ck			Nacl-0.5h			Nacl-1h			Nacl-3h			Nacl-5h			PEG-0.5h			PEG-1h			PEG-3h			PEG-3h
Pos	Cp		Pos	Cp		Pos	Cp		Pos	Cp		Pos	Cp		Pos	Cp		Pos	Cp		Pos	Cp		Pos	Cp
A1	18.57		A1	21.31		A1	19.81		A1	20.66		A1	19.82		A1	19.2		A1	20.33		A1	19.9		A1	20.09
A2	18.66		A2	21.49		A2	19.89		A2	20.8		A2	19.85		A2	19.16		A2	20.41		A2	19.99		A2	20.15
A3	18.66		A3	21.47		A3	19.92		A3	20.81		A3	19.89		A3	19.24		A3	20.42		A3	19.98		A3	19.99
A4	22.62		A4	24.88		A4	23.11		A4	24.19		A4	23.24		A4	23.06		A4	23.64		A4	23.28		A4	22.65
A5	22.63		A5	24.79		A5	23.1		A5	24.26		A5	23.23		A5	23.09		A5	23.64		A5	23.34		A5	22.64
A6	22.61		A6	24.92		A6	23.08		A6	24.22		A6	23.16		A6	23.06		A6	23.64		A6	23.27		A6	22.62
A7	22.85		A7	24.9		A7	23.24		A7	24.46		A7	23.23		A7	23.26		A7	23.68		A7	23.3		A7	22.75
A8	22.78		A8	25.02		A8	23.26		A8	24.5		A8	23.41		A8	23.26		A8	23.76		A8	23.44		A8	22.96
A9	22.81		A9	24.99		A9	23.29		A9	24.49		A9	23.29		A9	23.29		A9	23.74		A9	23.34		A9	22.8
A10	25.14		A10	27.16		A10	25.52		A10	26.16		A10	25.27		A10	25.11		A10	26.19		A10	25.79		A10	25.82
A11	25.21		A11	27.18		A11	25.51		A11	26.21		A11	25.42		A11	25.19		A11	26.46		A11	25.75		A11	25.95
A12	25.23		A12	27.11		A12	25.57		A12	26.27		A12	25.29		A12	25.03		A12	26.29		A12	25.94		A12	25.83
B1	24.71		B1	26.5		B1	24.24		B1	25.23		B1	25.02		B1	24.73		B1	25.55		B1	25.03		B1	25.46
B2			B2	26.32		B2	24.28		B2	25.3		B2	25.01		B2	24.73		B2	25.54		B2	25.22		B2	25.52
B3	24.76		B3	26.47		B3	24.3		B3	25.44		B3	25.05		B3	24.79		B3	25.56		B3	25.06		B3	25.54
B4	22.82		B4	26.18		B4	24.72		B4	25.74		B4	24.01		B4	23.43		B4	25.76		B4	25.14		B4	23.27
B5	22.87		B5	26.22		B5	24.68		B5	25.76		B5	24.06		B5	23.47		B5	25.77		B5	25.22		B5	23.28
B6	22.84		B6	26.2		B6	24.69		B6	25.74		B6	24.02		B6	23.34		B6	25.87		B6	25.27		B6	23.24
B7	22.87		B7	26.16		B7	24.75		B7	25.71		B7	24.03		B7	23.33		B7	25.88		B7	25.28		B7	23.23
B8	22.86		B8	26.2		B8	24.78		B8	25.8		B8	24.05		B8	23.43		B8	25.87		B8	25.26		B8	23.27
B9	22.84		B9	26.11		B9	24.79		B9	25.73		B9	24.05		B9	23.42		B9	25.88		B9	25.23		B9	23.23
B10	24.94		B10	25.94		B10	24.42		B10	24.83		B10	24.11		B10	24.57		B10	25.11		B10	24.46		B10	24.67
B11	24.9		B11	26.03		B11	24.47		B11	24.85		B11	24.1		B11	24.58		B11	25.12		B11	24.33		B11	24.7
B12	24.95		B12	25.98		B12	24.47		B12	24.88		B12	24.16		B12	24.57		B12	25.14		B12	24.42		B12	24.61
C1	25.05		C1	26.6		C1	24.68		C1	25.89		C1	24.09		C1	24.79		C1	25.56		C1	24.67		C1	25.12
C2	25.1		C2	26.58		C2	24.84		C2	25.25		C2	26.66		C2	24.89		C2	25.64		C2	24.82		C2	25.03
C3	25.1		C3	26.46		C3	24.79		C3	25.2		C3	24.32		C3	24.86		C3	25.58		C3	24.78		C3	25.2
C4	24.44		C4	25.79		C4	25.06		C4	25.84		C4	24.95		C4	24.08		C4	25.65		C4	25.09		C4	25.02
C5	24.33		C5	26.25		C5	25.04		C5	25.87		C5	24.92		C5	24.04		C5	25.66		C5	25.02		C5	25.09
C6	24.42		C6	26.23		C6	25.02		C6	25.8		C6	25.05		C6	24.01		C6	25.67		C6	25.04		C6	24.98
C7	24.04		C7	25.85		C7	24.55		C7	25.47		C7	24.65		C7	23.78		C7	25.28		C7	24.8		C7	24.57
C8	24.02		C8	25.87		C8	24.58		C8	25.5		C8	24.77		C8	23.82		C8	25.31		C8	24.8		C8	24.62
C9	24.05		C9	25.96		C9	24.58		C9	25.53		C9	24.72		C9	23.79		C9	25.19		C9	24.76		C9	24.54
C10	24.91		C10	26.73		C10	25.11		C10	26.17		C10	25.29		C10	24.89		C10	25.79		C10	25.45		C10	25.32
C11	24.85		C11	26.73		C11	25.05		C11	26.16		C11	25.28		C11	24.83		C11	25.82		C11	25.44		C11	25.24
C12	24.83		C12	26.71		C12	25.04		C12	26.21		C12	25.2		C12	24.81		C12	25.7		C12	25.43		C12	25.26
D1	24.95		D1	26.7		D1	25.11		D1	25.92		D1	25.02		D1	24.88		D1	25.97		D1	25.27		D1	25.48
D2	24.95		D2	26.75		D2	25.05		D2	25.94		D2	25.21		D2	24.87		D2	25.88		D2	25.48		D2	25.52
D3	25.05		D3	26.53		D3	25.15		D3	25.78		D3	25.2		D3	24.82		D3	25.97		D3	25.31		D3	25.49
D4	27.45		D4	29.63		D4	27.27		D4	27.75		D4	27.75		D4	26.85		D4	28.6		D4	27.66		D4	27.71
D5	27.09		D5	29.55		D5	27.44		D5	27.78		D5	27.8		D5	26.72		D5	28.61		D5	27.74		D5	27.68
D6	27.12		D6	29.69		D6	27.28		D6	27.91		D6	27.93		D6	26.84		D6	28.55		D6	27.75		D6	27.61
D7	25.72		D7	28.22		D7	25.84		D7	26.25		D7	25.1		D7	25.13		D7	26.73		D7	25.68		D7	25.75
D8	25.59		D8	28.31		D8	25.86		D8	26.13		D8	25.09		D8	25.03		D8	26.74		D8	25.73		D8	25.59
D9	25.71		D9	27.92		D9	25.89		D9	26.12		D9	25.07		D9	25.06		D9	26.78		D9	25.69		D9	25.57
D10	27.71		D10	29.25		D10	28.61		D10	30.11		D10	27.95		D10	28.78		D10	28.77		D10	29.1		D10	29.03
D11	27.77		D11	27.83		D11	28.04		D11	29.64		D11	28.5		D11	28.28		D11	29.79		D11	29.48		D11	29.1
D12	28.2		D12	28.77		D12	27.84		D12	29.8		D12	27.28		D12	28.01		D12	28.2		D12	29.13		D12	28.15
E1	26.86		E1	27.93		E1	26.55		E1	27.45		E1	26		E1	25.91		E1	27.59		E1	26.62		E1	26.51
E2	26.85		E2	28.3		E2	26.54		E2	27.5		E2	26.11		E2	26.08		E2	25.49		E2	26.58		E2	26.51
E3	26.87		E3	28.24		E3	26.52		E3	27.56		E3	26.13		E3	25.99		E3	27.68		E3	26.57		E3	26.56
E4	29.12		E4	30.04		E4	28.46		E4	29.41		E4	28.16		E4	28.08		E4	29.64		E4	28.78		E4	28.52
E5	29.19		E5	30.47		E5	28.58		E5	29.72		E5	28.24		E5	28.15		E5	29.73		E5	28.83		E5	28.7
E6	28.57		E6	30.7		E6	28.34		E6	29.55		E6	28.12		E6	28.07		E6	29.99		E6	28.8		E6	28.73
E7	32.14		E7	32.62		E7	31.2		E7	33		E7	30.33		E7	29.68		E7	33		E7	32.96		E7	31.12
E8	31.46		E8	35		E8	30.8		E8	32.96		E8	29.85		E8	29.78		E8	33		E8	32.28		E8	30.7
E9	31.45		E9	32.37		E9	30.21		E9	33		E9	30.09		E9	29.92		E9	33		E9	32.81		E9	31.39
E10	24.76		E10	27.77		E10	25.64		E10	27.1		E10	24.56		E10	25.23		E10	27.11		E10	26.46		E10	25.95
E11	24.79		E11	27.62		E11	25.77		E11	26.78		E11	24.53		E11	25.17		E11	27.02		E11	26.21		E11	26
E12	24.71		E12	27.14		E12	25.23		E12	26.7		E12	24.23		E12	25.17		E12	28.06		E12	26.41		E12	25.53
F1	25.33		F1	26.04		F1	24.89		F1	26.17		F1	24.8		F1	23.77		F1	26.14		F1	26.02		F1	25.26
F2	25.49		F2	26.28		F2	24.87		F2	26.3		F2	25.08		F2	24.02		F2	25.9		F2	26.01		F2	25.47
F3	25.52		F3	26.42		F3	24.97		F3	26.75		F3	25.16		F3	24.13		F3	26.01		F3	26.11		F3	25.27
F4	24.83		F4	25.71		F4	24.05		F4	25.74		F4	24.53		F4	23.43		F4	25.45		F4	25.57		F4	24.56
F5	24.86		F5	25.71		F5	24.09		F5	25.75		F5	24.55		F5	23.33		F5	25.44		F5	25.57		F5	24.6
F6	24.84		F6	25.74		F6	24.08		F6	25.74		F6	24.54		F6	23.43		F6	25.34		F6	25.58		F6	24.58
F7	24.77		F7	26.81		F7	24.93		F7	25.94		F7	24.54		F7	24.75		F7	25.97		F7	25.54		F7	24.73
F8	24.84		F8	26.95		F8	25		F8	25.97		F8	24.58		F8	24.8		F8	26.01		F8	25.56		F8	24.67
F9	24.88		F9	26.94		F9	24.89		F9	25.98		F9	24.55		F9	24.72		F9	26.43		F9	25.55		F9	24.67
F10	24.82		F10	27.02		F10	25.05		F10	25.96		F10	24.26		F10	24.67		F10	25.97		F10	25.28		F10	24.94
F11	24.9		F11	26.98		F11	25.02		F11	25.95		F11	24.28		F11	24.79		F11	25.84		F11	25.41		F11	24.57
F12	24.86		F12	26.67		F12	24.9		F12	26.01		F12	24.26		F12	24.79		F12	26.09		F12	25.5		F12	24.57
G1	26.44		G1	28.24		G1	26.52		G1	27.03		G1	25.93		G1	26.02		G1	27.69		G1	26.69		G1	26.71
G2	26.3		G2	28.21		G2	26.49		G2	27.22		G2	25.96		G2	25.85		G2	27.67		G2	26.8		G2	26.73
G3	26.42		G3	28.49		G3	26.44		G3	27.23		G3	26.04		G3	26.11		G3	27.61		G3	26.77		G3	26.67
G4	26.84		G4	28.83		G4	27.1		G4	28.04		G4	26.89		G4	26.78		G4	27.9		G4	27.55		G4	27.13
G5	26.94		G5	28.43		G5	27.06		G5	27.7		G5	26.79		G5	26.75		G5	27.92		G5	27.51		G5	27.18
G6	27.31		G6	28.54		G6	27.04		G6	28.08		G6	26.91		G6	26.79		G6	27.91		G6	27.64		G6	27.16
G7	28.66		G7	32.25		G7	30.28		G7	33		G7	32		G7	30.07		G7	33		G7	31.81		G7	31.11
G8	28.87		G8	31.62		G8	30.85		G8	33		G8	32		G8	29.97		G8	33		G8	32.25		G8	31.1
G9	28.9		G9	31.81		G9	31.08		G9	33		G9	32		G9	30.1		G9	32.46		G9	32.29		G9	31.26
G10	26.91		G10	28.75		G10	27.07		G10	28.66		G10	27.45		G10	26.17		G10	27.93		G10	28.73		G10	27.47
G11	26.83		G11	28.68		G11	27.05		G11	28.71		G11	27.5		G11	26.13		G11	28		G11	28.7		G11	27.46
G12	26.92		G12	28.58		G12	27.06		G12	28.71		G12	27.6		G12	26.17		G12	28.1		G12	28.61		G12	27.52
H1	25.28		H1	27.06		H1	26		H1	27.07		H1	25.5		H1	24.83		H1	26.06		H1	26.43		H1	25.09
H2	25.41		H2	27.03		H2	26.01		H2	27.11		H2	25.62		H2	24.75		H2	26.04		H2	26.44		H2	25.13
H3	25.84		H3	26.93		H3	26		H3	27.21		H3	25.58		H3	24.61		H3	26		H3	26.49		H3	25.02
H4	26.8		H4	28.91		H4	27.61		H4	28.82		H4	26.68		H4	26.21		H4	27.66		H4	27.91		H4	26.6
H5	26.68		H5	28.95		H5	27.52		H5	28.87		H5	26.66		H5	26.15		H5	27.69		H5	27.87		H5	26.6
H6	26.82		H6	28.74		H6	27.58		H6	28.94		H6	26.68		H6	26.29		H6	33		H6	27.82		H6	26.5
H7	22.57		H7	24.59		H7	23.06		H7	24.13		H7	22.21		H7	22.92		H7	23.87		H7	23.81		H7	22.77
H8	22.51		H8	24.53		H8	23.09		H8	24.16		H8	22.24		H8	22.95		H8	23.85		H8	23.86		H8	22.75
H9	22.49		H9	24.51		H9	23.08		H9	24.12		H9	22.27		H9	22.91		H9	23.94		H9	23.84		H9
H10	22.24		H10	24.5		H10	22.92		H10	24.15		H10	22.28		H10	22.8		H10	23.78		H10	23.78		H10	22.71
H11	22.23		H11	24.54		H11	22.97		H11	24.16		H11	22.31		H11	22.82		H11	23.78		H11	23.75		H11	22.74
H12	22.29		H12	24.49		H12	22.98		H12	25.76		H12	22.31		H12	22.84		H12	23.85		H12	23.63		H12
G7	24.1
G8	24.11		A1	27.15		B1	25.85		C1	26.64		D1	25.16		E1	25.13		F1	25.8		A1	25.62		B1	26.14
G9	24.06		A2	27		B2	25.99		C2	26.68		D2	25.15		E2	25.19		F2	25.93		A2	25.71		B2	26.08
G10	25.21		A3	27.15		B3	26.04		C3	26.64		D3	25.03		E3	25.3		F3	25.97		A3	25.75		B3	26.1
G11	25.08		A4	27.67		B4	26.72		C4	27.42		D4	26.2		E4	25.81		F4	27.07		A4	26.81		B4	26.61
G12	25.33		A5	27.6		B5	26.79		C5	27.55		D5	26.05		E5	26.08		F5	27.19		A5	26.73		B5	26.79
H1	25.46		A6	27.8		B6	26.9		C6	27.65		D6	26.05		E6	25.86		F6	26.93		A6	26.74		B6	26.57
H2	25.52		A7	27.24		B7	25.25		C7	25.47		D7	24.2		E7	25.28		F7	26.88		A7	26.03		B7	25.89
H3	25.57		A8	27.28		B8	25.02		C8	25.4		D8	24.2		E8	25.31		F8	26.76		A8	25.94		B8	25.77
H4	24.98		A9	27.19		B9	25.15		C9	25.51		D9	24		E9	25.26		F9	26.88		A9	25.94		B9	25.86
H5	25.02		A10	27.05		B10	24.89		C10	25.07		D10	23.92		E10	24.81		F10	26.56		A10	25.64		B10	25.49
H6	24.97		A11	26.96		B11	24.91		C11	25.08		D11	23.89		E11	24.75		F11	26.61		A11	25.71		B11	25.34
			A12	26.94		B12	24.89		C12	25.08		D12	23.9		E12	24.77		F12	26.52		A12	25.64		B12	25.33
